# Supplementary material for: The Regulatory Microenvironment in Feathers of Chickens Infected with Very Virulent Marek’s Disease Virus
Source: MDPI journal article supplement (doi:10.3390/v14010112), 2022-01-09

# The Regulatory Microenvironment in Feathers of Chickens Infected with Very virulent Marek's Disease Virus

Jegarubee Bavananthasivam <sup>1,†</sup>, Nadiyah Alqazlan <sup>1</sup>, Mohammadali Alizadeh <sup>1</sup>, Ayumi Matsuyama-Kato <sup>1</sup>, Jake Astill <sup>1,‡</sup>, Raveendra R. Kulkarni <sup>2</sup> and Shayan Sharif <sup>1,\*</sup>

Supplementary figure S1: The gating strategy with the representative FACS plots.

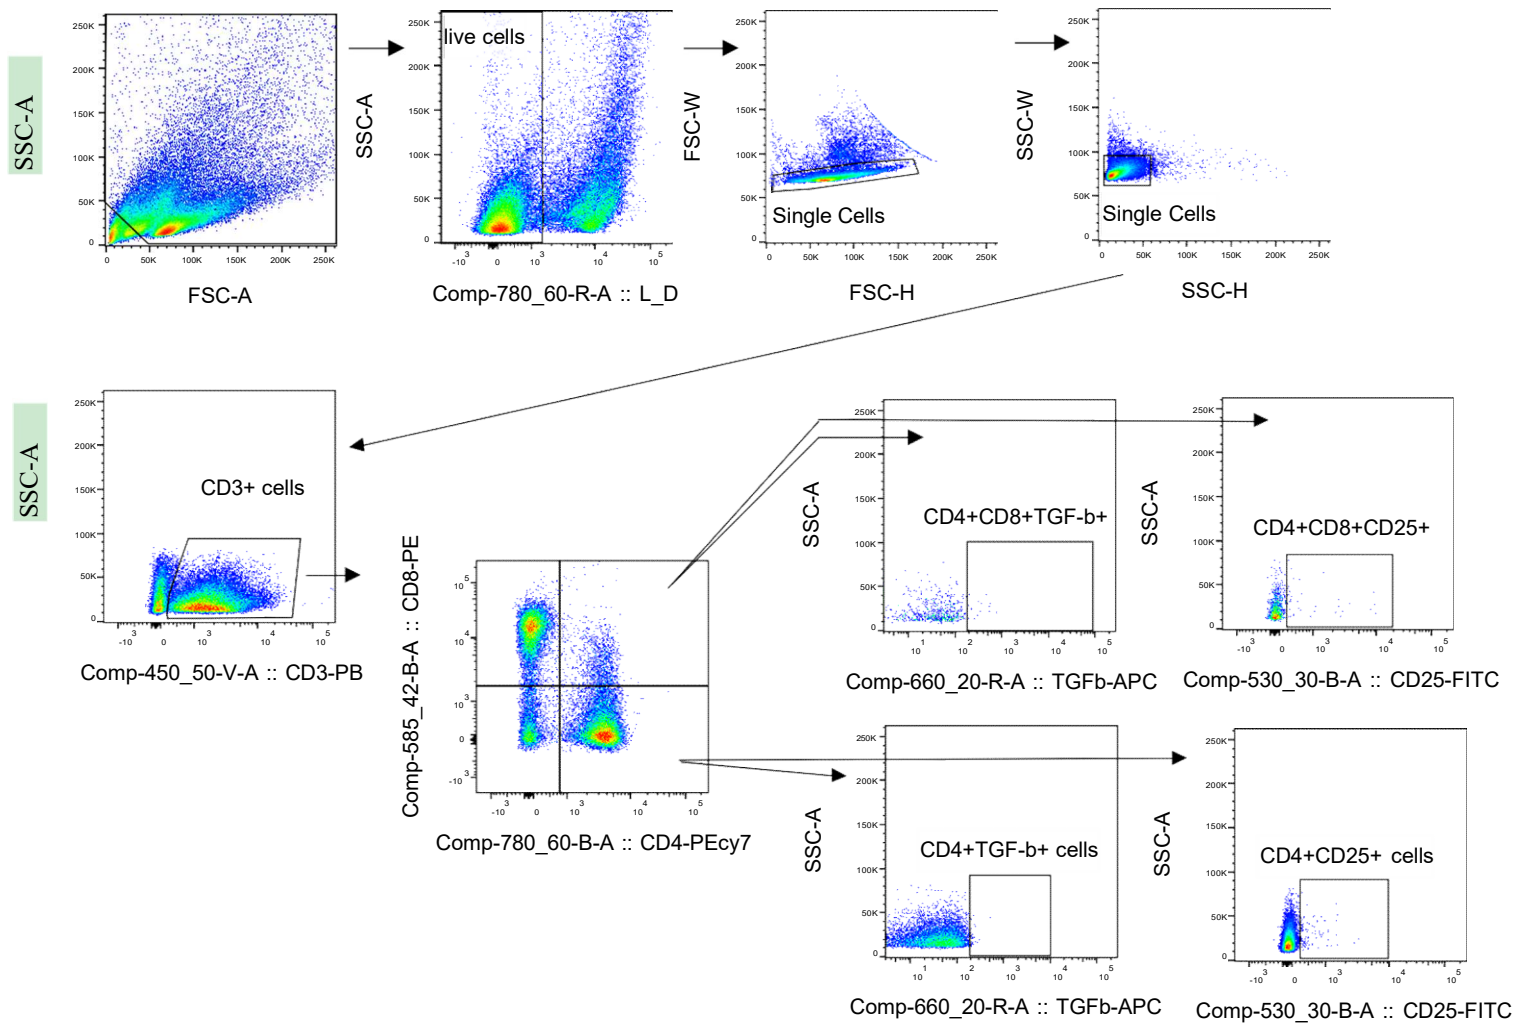

Supplement: s1 [file s1]
